# Supplementary material for: Health Status of Mytilus chilensis from Intensive Culture Areas in Chile Assessed by Molecular, Microbiological, and Histological Analyses
Source: MDPI journal article supplement (doi:10.3390/pathogens11050494), 2022-04-21
Supplement: s1 [file s1]

## Supplementary Material

**Table S1.** Primers sequences used in this study.

| Target                                              | Name        | Sequence 5 -> 3                                              | PCR product<br>bp | Ref  |
|-----------------------------------------------------|-------------|--------------------------------------------------------------|-------------------|------|
| <i>Marteilia refringens</i>                         | Pr4         | CCGCACACGTTCTTCACTCC                                         | 412               | [22] |
|                                                     | Pr5         | CTCGCGAGTTTCGACAGACG                                         |                   |      |
| <i>B. exitiosa</i> / <i>B. ostrae</i>               | Bo          | CATTTAATTGGTCGGGCCGC                                         | 300               | [58] |
|                                                     | Boas        | CTGATCGTCTTCGATCCCC                                          |                   |      |
| <i>Candidatus Xenohali-<br/>otis californiensis</i> | RA 3.6      | ACTTGGACTCATTCAAAAGCGGA                                      | 160               | [67] |
|                                                     | RA 5-1      | GTTGAACGTGCCTTCAGTTTAC                                       |                   |      |
| <i>P. marinus</i> / <i>P. olsenii</i>               | PerKITS85   | CCGCTTTGTTTGGATCCC                                           | 703               | [68] |
|                                                     | PerKITS750  | ACATCAGGCCTTCTAATGATG                                        |                   |      |
| OsHV-1                                              | C5          | CCGTGACTTCTATGGGTATGTCAG                                     | 765               | [56] |
|                                                     | C13         | CCTCGAGGTAGCTTTTGTCAAG                                       |                   |      |
|                                                     | C2          | CTCTTTACCATGAAGATACCCACC                                     | 352               |      |
|                                                     | C4          | GCAGTTGTGGTATACTCGAGATTG                                     |                   |      |
| HVA b                                               | ORF77F1     | CAACCACTTGTTTCGGGTTCT                                        | 190               | [69] |
|                                                     | ORF77R1     | CAGGGTGATTAATGCCGAGT                                         |                   |      |
|                                                     | ORF77 Probe | FAM-TCCGTACGCGGGATCTTCGT -TAMRA                              |                   |      |
| <i>Mytilus chilensis</i>                            | Me15        | CCAGTATACAAACCTGTGAAGA                                       | 126               | [70] |
|                                                     | Me16        | TGTTGTCTTAATAGGTTTGTGAAGA                                    |                   |      |
| Eukaryotic V4 re-<br>gion                           | E27F        | TCGTCGGCAGCGTCAGATGTGTATAAGAGA-<br>CAGCYGCGGTAATTCCAGCTC     |                   | [71] |
|                                                     | E1009R      | GTCTCGTGGGCTCGGAGATGTGTATAAGAGA-<br>CAGAYGGTATCTRATCRTCCTTYG |                   |      |

**Table S2.** Primers concentration and PCR conditions used in this study.

| Primer Fwd/Rv             | Primer $\mu$ M | Probe $\mu$ M | Annealing Tm $^{\circ}$ C | Time (Sec) | N° Cycles |
|---------------------------|----------------|---------------|---------------------------|------------|-----------|
| Bo / Boas                 | 1.0            |               | 55                        | 60         | 35        |
| Pr4 / Pr5                 | 1.0            |               | 55                        | 60         | 40        |
| ORF77F1 / ORF77R1 / Probe | 0.3            | 0.1           | 60                        | 30         | 40        |
| RA 3.6 / RA 5.1           | 0.3            |               | 62                        | 60         | 30        |
| C2 / C6                   | 0.2            |               | 50                        | 60         | 35        |
| PerKITS86 / PerKITS750    | 0.1            |               | 55                        | 60         | 40        |
| Me15/Me16                 | 0.1            |               | 56                        | 30         | 30        |

**Table S3.** Relative abundance (%) of sequences in gut assigned to different families.

| Taxa                       | WT1        | WT2        | MF1        | MF2        | MF3        |
|----------------------------|------------|------------|------------|------------|------------|
| <i>Pteriomorphia</i>       | 68.8551154 | 65.9160075 | 78.0093741 | 79.0261738 | 76.2784822 |
| Not_assigned               | 20.3056609 | 20.1256088 | 20.8194826 | 20.7619244 | 22.4752859 |
| <i>Peridiniales</i>        | 7.61998297 | 12.218167  | 0.07290959 | 0.0360853  | 0.3309753  |
| <i>Copepoda</i>            | 0.98744988 | 0.00402961 | 0.00970951 | 0.03910566 | 0.21807799 |
| <i>Mediophyceae</i>        | 0.55033979 | 0.45208408 | 0.02471511 | 0.00524588 | 0.0580423  |
| <i>Ebriacea</i>            | 0.33119192 | 0.42713886 | 0.00123576 | 0          | 0.00939413 |
| <i>Coscinodiscophytina</i> | 0.25037002 | 0.16214391 | 0          | 0          | 0          |
| <i>Bacillariophyceae</i>   | 0.1389188  | 0.0544957  | 0.00070615 | 0          | 0.00553583 |
| <i>Melosirids</i>          | 0.13220011 | 0.08961089 | 0          | 0          | 0          |
| <i>Thoracosphaeraceae</i>  | 0.12350534 | 0.07330056 | 0.0164179  | 0          | 0.07649505 |
| <i>Syndiniales</i>         | 0.12073882 | 0.04777968 | 0.06320008 | 0.01859903 | 0.17932721 |
| <i>Chlorophyceae</i>       | 0.08576211 | 0.04566893 | 0          | 0          | 0          |
| <i>Sphaeropleales</i>      | 0.07904342 | 0.07234113 | 0          | 0          | 0          |
| <i>Diatomea</i>            | 0.06382756 | 0.04048801 | 0          | 0          | 0          |
| <i>Trebouxiophyceae</i>    | 0.04920453 | 0.05257684 | 0          | 0          | 0.00402606 |
| <i>Cryptomycota</i>        | 0.04367149 | 0.02264258 | 0          | 0          | 0          |
| <i>Bacillariophytina</i>   | 0.03576715 | 0.01765354 | 0          | 0          | 0          |
| <i>Collodaria</i>          | 0.0324078  | 0          | 0          | 0          | 0          |
| <i>Thecofilosea</i>        | 0.0278628  | 0.0055647  | 0.0019419  | 0          | 0.00218078 |
| <i>Suessiaceae</i>         | 0.02647954 | 0          | 0.00547263 | 0.00238449 | 0.04227358 |
| <i>Phragmoplastophyta</i>  | 0.0162039  | 0          | 0          | 0          | 0          |
| <i>Prasinophytiae</i>      | 0.01561107 | 0.01592656 | 0          | 0          | 0          |
| <i>Abeoformidae</i>        | 0.0114613  | 0.00940243 | 0.00441341 | 0          | 0.00989739 |
| <i>Fragilariales</i>       | 0.0114613  | 0.00307018 | 0          | 0          | 0          |
| <i>Pyramimonadales</i>     | 0.00968282 | 0          | 0          | 0          | 0          |

|                             |            |            |            |            |            |
|-----------------------------|------------|------------|------------|------------|------------|
| <i>Monogononta</i>          | 0.00790434 | 0.00364584 | 0.03618999 | 0          | 0.02516285 |
| <i>Dipodascaceae</i>        | 0.00770673 | 0          | 0          | 0          | 0          |
| <i>Gymnodinium_clade</i>    | 0.00731152 | 0.00307018 | 0          | 0          | 0          |
| <i>Emiliana</i>             | 0.00592826 | 0.00115132 | 0          | 0          | 0.00570358 |
| <i>Oligohymenophorea</i>    | 0.00592826 | 0          | 0          | 0          | 0          |
| <i>Chromulinales</i>        | 0.004545   | 0          | 0          | 0          | 0          |
| <i>Olpidiopsis</i>          | 0.00434739 | 0          | 0          | 0          | 0          |
| <i>Myrtales</i>             | 0.00414978 | 0          | 0          | 0          | 0          |
| <i>Pseudoperkinsidae</i>    | 0.00414978 | 0          | 0          | 0.00222553 | 0.00603908 |
| <i>Ceratostomataceae</i>    | 0.00395217 | 0          | 0          | 0          | 0          |
| <i>Ophiocordycipitaceae</i> | 0.00395217 | 0          | 0          | 0          | 0          |
| <i>Saccharomycetaceae</i>   | 0.00355695 | 0          | 0          | 0          | 0          |
| <i>Colpodellida</i>         | 0.00335935 | 0.00671602 | 0          | 0          | 0          |
| <i>Paulinellidae</i>        | 0.00296413 | 0.00230264 | 0          | 0          | 0          |
| <i>Thraustochytriaceae</i>  | 0.00256891 | 0.00172698 | 0          | 0          | 0.0035228  |
| <i>Neopterygii</i>          | 0.00197609 | 0          | 0          | 0          | 0          |
| <i>Prostomatea</i>          | 0.00177848 | 0          | 0          | 0          | 0          |
| <i>Hydroidolina</i>         | 0          | 0.00076755 | 0.44875586 | 0.10014863 | 0.14409923 |
| <i>Gastropoda</i>           | 0          | 0          | 0.25050534 | 0          | 0          |
| <i>Thecostraca</i>          | 0          | 0          | 0.09144592 | 0          | 0          |
| <i>Scolecida</i>            | 0          | 0.00345395 | 0.05949281 | 0          | 0          |
| <i>Heteroconchia</i>        | 0          | 0          | 0.04219223 | 0          | 0.02734363 |
| <i>Araucariales</i>         | 0          | 0.02916671 | 0.01659443 | 0          | 0          |
| <i>Spumellaria</i>          | 0          | 0          | 0.00847375 | 0          | 0          |
| <i>Chromadorea</i>          | 0          | 0.01554279 | 0.00564917 | 0          | 0          |
| <i>Palpata</i>              | 0          | 0.00479716 | 0.00476649 | 0          | 0          |
| <i>Tetrapoda</i>            | 0          | 0          | 0.0019419  | 0          | 0.00067101 |
| <i>Rhodymeniophycidae</i>   | 0          | 0.00345395 | 0.00176537 | 0          | 0          |
| <i>Protaspidae</i>          | 0          | 0          | 0.00141229 | 0          | 0.02482734 |
| <i>Echinodermata</i>        | 0          | 0          | 0.00123576 | 0          | 0          |
| <i>Apiosporaceae</i>        | 0          | 0          | 0          | 0          | 0.0070456  |
| <i>Asciidiacea</i>          | 0          | 0.01228072 | 0          | 0          | 0          |
| <i>Basal_Group_T</i>        | 0          | 0.00249452 | 0          | 0          | 0          |
| <i>Capsasporidae</i>        | 0          | 0          | 0          | 0          | 0.00134202 |
| <i>Chlamydomonadales</i>    | 0          | 0.00019189 | 0          | 0          | 0          |
| <i>Chlorodendrales</i>      | 0          | 0          | 0          | 0          | 0.03103418 |
| <i>Choreotrichia</i>        | 0          | 0.00402961 | 0          | 0          | 0          |
| <i>Chytridiomycetes</i>     | 0          | 0.00307018 | 0          | 0          | 0          |
| <i>Clade_L</i>              | 0          | 0.00057566 | 0          | 0          | 0          |
| <i>Cyphoderiidae</i>        | 0          | 0.00767545 | 0          | 0          | 0          |

|                               |   |            |   |            |            |
|-------------------------------|---|------------|---|------------|------------|
| <i>Eugregarinorida</i>        | 0 | 0.00211075 | 0 | 0          | 0          |
| eukaryote_marine_clone_ME1-24 | 0 | 0          | 0 | 0          | 0.00285179 |
| <i>Eustigmatales</i>          | 0 | 0.00076755 | 0 | 0          | 0          |
| <i>Glissomonadida</i>         | 0 | 0          | 0 | 0.00063586 | 0          |
| <i>Incertae_Sedis</i>         | 0 | 0.0209156  | 0 | 0          | 0          |
| <i>Ochromonadales</i>         | 0 | 0.00057566 | 0 | 0          | 0          |
| <i>Peregriniidae</i>          | 0 | 0.00076755 | 0 | 0          | 0          |
| <i>Peridiniphyctidae</i>      | 0 | 0          | 0 | 0          | 0.02902115 |
| <i>Perkinsidae</i>            | 0 | 0.00153509 | 0 | 0          | 0          |
| <i>Pezizomycotina</i>         | 0 | 0.00882677 | 0 | 0          | 0          |
| <i>Sorodiplophrys</i>         | 0 | 0.00095943 | 0 | 0          | 0          |
| <i>Spermatophyta</i>          | 0 | 0.00172698 | 0 | 0          | 0          |
| <i>Spirotrichea</i>           | 0 | 0          | 0 | 0.00747141 | 0          |
| uncultured_eukaryote          | 0 | 0          | 0 | 0          | 0.00134202 |

**Table S4.** Relative abundance (%) of sequences in gut assigned to different genera.

| Taxa                               | WT1        | WT2        | MF1        | MF2        | MF3        |
|------------------------------------|------------|------------|------------|------------|------------|
| <i>Mytiloida</i>                   | 68.8541274 | 65.9160075 | 78.0093741 | 79.0261738 | 76.2784822 |
| Not_assigned                       | 20.5198686 | 20.3244029 | 20.8553195 | 20.7619244 | 22.4967582 |
| <i>Heterocapsa</i>                 | 7.42474573 | 12.0136163 | 0          | 0          | 0          |
| <i>Calanoida</i>                   | 0.90346625 | 0.00402961 | 0.00970951 | 0.02305008 | 0.21807799 |
| <i>Ebria</i>                       | 0.33119192 | 0.42713886 | 0.00123576 | 0          | 0.00939413 |
| <i>Thalassiosira</i>               | 0.33040148 | 0.30394787 | 0          | 0.00381519 | 0.03657    |
| <i>Actinocyclus</i>                | 0.17270987 | 0.11858572 | 0          | 0          | 0          |
| <i>Amphidiniopsis</i>              | 0.11955317 | 0.07464376 | 0          | 0          | 0          |
| <i>Syndiniales_Group_I</i>         | 0.10611579 | 0.02532899 | 0.06320008 | 0.0178042  | 0.17932721 |
| <i>Cyclotella</i>                  | 0.09900188 | 0.09805389 | 0          | 0          | 0          |
| <i>Navicula</i>                    | 0.09603775 | 0.01093752 | 0          | 0          | 0.00553583 |
| <i>Melosira</i>                    | 0.0855645  | 0.07713828 | 0          | 0          | 0          |
| <i>Monstrilloida</i>               | 0.07034864 | 0          | 0          | 0          | 0          |
| <i>Scrippsiella</i>                | 0.06817495 | 0.04662837 | 0.0164179  | 0          | 0.06257161 |
| <i>Coscinodiscophytina</i>         | 0.06382756 | 0.04048801 | 0          | 0          | 0          |
| <i>Minutocellus</i>                | 0.06204908 | 0.03338821 | 0          | 0          | 0          |
| <i>Coscinodiscus</i>               | 0.05651604 | 0.02974237 | 0          | 0          | 0          |
| <i>Aulacoseira</i>                 | 0.04663562 | 0          | 0          | 0          | 0          |
| LKM11                              | 0.04367149 | 0.02264258 | 0          | 0          | 0          |
| <i>Bacillariophyceae</i>           | 0.03576715 | 0.01765354 | 0          | 0          | 0          |
| <i>Siphonosphaera</i>              | 0.0324078  | 0          | 0          | 0          | 0          |
| uncultured_Chlorophyta             | 0.03023411 | 0.00441338 | 0          | 0          | 0          |
| <i>Chlamydomonas_sp._NIES-3904</i> | 0.0300365  | 0.03204501 | 0          | 0          | 0          |

|                                  |            |            |            |            |            |
|----------------------------------|------------|------------|------------|------------|------------|
| <i>Pfiesteria</i>                | 0.02904846 | 0.0097862  | 0          | 0          | 0          |
| <i>Coelastrum</i>                | 0.02746759 | 0.02225881 | 0          | 0          | 0          |
| <i>Desmodesmus</i>               | 0.02608433 | 0.03108558 | 0          | 0          | 0          |
| <i>Symbiodinium</i>              | 0.02529389 | 0          | 0          | 0          | 0          |
| <i>Archaeoperidinium</i>         | 0.02470107 | 0.0195724  | 0.07290959 | 0.0360853  | 0.26739717 |
| <i>Rhaphoneis</i>                | 0.02430585 | 0          | 0          | 0          | 0          |
| <i>Durinskia</i>                 | 0.02193455 | 0.02974237 | 0          | 0          | 0          |
| <i>Actinoptychus</i>             | 0.02114411 | 0.01381581 | 0          | 0          | 0          |
| <i>Zygnematophyceae</i>          | 0.0162039  | 0          | 0          | 0          | 0          |
| <i>Peridinium</i>                | 0.01561107 | 0.00921054 | 0          | 0          | 0          |
| <i>Pseudo-nitzschia</i>          | 0.01561107 | 0.04010423 | 0          | 0          | 0          |
| <i>Cyclopoida</i>                | 0.01363499 | 0          | 0          | 0          | 0          |
| <i>Diplopsalis</i>               | 0.01343738 | 0.02494522 | 0          | 0          | 0          |
| <i>Chaetoceros</i>               | 0.01185651 | 0.00575659 | 0.00300112 | 0          | 0.00872312 |
| <i>Fragilaria</i>                | 0.0114613  | 0.00307018 | 0          | 0          | 0          |
| <i>Marine_Ichthyosporeans_1</i>  | 0.0114613  | 0.00940243 | 0          | 0          | 0          |
| uncultured_eukaryote             | 0.01027564 | 0.0237939  | 0          | 0          | 0.00218078 |
| <i>Pterosperma</i>               | 0.00968282 | 0          | 0          | 0          | 0          |
| <i>Syndiniales_Group_II</i>      | 0.00869478 | 0.00537282 | 0          | 0.00079483 | 0          |
| <i>Ploimida</i>                  | 0.00790434 | 0.00364584 | 0.03618999 | 0          | 0.02516285 |
| <i>Saprochaete</i>               | 0.00770673 | 0          | 0          | 0          | 0          |
| uncultured                       | 0.00632347 | 0.01036186 | 0.01041566 | 0          | 0.00218078 |
| <i>Emiliana_huxleyi_CCMP1516</i> | 0.00592826 | 0.00115132 | 0          | 0          | 0.00570358 |
| <i>Scuticociliatia</i>           | 0.00592826 | 0          | 0          | 0          | 0          |
| <i>Golenkinia_sp._UTEX_931</i>   | 0.0047426  | 0.00249452 | 0          | 0          | 0          |
| <i>Chromulina</i>                | 0.004545   | 0          | 0          | 0          | 0          |
| <i>Eucalyptus</i>                | 0.00414978 | 0          | 0          | 0          | 0          |
| <i>Pseudoperkinsus</i>           | 0.00414978 | 0          | 0          | 0.00222553 | 0.00167752 |
| <i>Ophiocordyceps</i>            | 0.00395217 | 0          | 0          | 0          | 0          |
| <i>Sphaerodes</i>                | 0.00395217 | 0          | 0          | 0          | 0          |
| <i>Saccharomyces</i>             | 0.00355695 | 0          | 0          | 0          | 0          |
| <i>Colpodella</i>                | 0.00335935 | 0          | 0          | 0          | 0          |
| <i>Paulinella</i>                | 0.00296413 | 0.00230264 | 0          | 0          | 0          |
| <i>Mychonastes</i>               | 0.0023713  | 0          | 0          | 0          | 0          |
| uncultured_Trebouxiophyceae      | 0.00217369 | 0          | 0          | 0          | 0          |
| <i>Teleostei</i>                 | 0.00197609 | 0          | 0          | 0          | 0          |
| <i>Cryptocaryon</i>              | 0.00177848 | 0          | 0          | 0          | 0          |
| <i>Biecheleria</i>               | 0.00118565 | 0          | 0          | 0          | 0          |
| <i>Chytridinium</i>              | 0.00098804 | 0          | 0          | 0          | 0          |
| aca                              | 0          | 0          | 0.00441341 | 0          | 0.00989739 |

|                               |   |            |            |            |            |
|-------------------------------|---|------------|------------|------------|------------|
| <i>Amphora</i>                | 0 | 0.00287829 | 0          | 0          | 0          |
| <i>Anthoathecata</i>          | 0 | 0.00076755 | 0.02065477 | 0          | 0          |
| <i>Aplanochytrium</i>         | 0 | 0          | 0          | 0          | 0.0035228  |
| <i>Arthrinium</i>             | 0 | 0          | 0          | 0          | 0.0070456  |
| <i>Blastodinium</i>           | 0 | 0.00172698 | 0          | 0          | 0          |
| <i>Caenogastropoda</i>        | 0 | 0          | 0.14528956 | 0          | 0          |
| <i>Choreotrichia</i>          | 0 | 0          | 0          | 0.00747141 | 0          |
| <i>Choricystis</i>            | 0 | 0.01918863 | 0          | 0          | 0          |
| <i>Chromadorida</i>           | 0 | 0          | 0.00564917 | 0          | 0          |
| <i>Cyphoderia</i>             | 0 | 0.00767545 | 0          | 0          | 0          |
| D2P04A09                      | 0 | 0.00076755 | 0          | 0          | 0          |
| D3P05A02                      | 0 | 0.00211075 | 0          | 0          | 0          |
| <i>Dinobryon</i>              | 0 | 0.00057566 | 0          | 0          | 0          |
| <i>Dothideomycetes</i>        | 0 | 0.00882677 | 0          | 0          | 0          |
| <i>Echinoidea</i>             | 0 | 0          | 0.00123576 | 0          | 0          |
| eukaryote_marine_clone_ME1-24 | 0 | 0          | 0          | 0          | 0.00285179 |
| <i>Eunicida</i>               | 0 | 0          | 0.00476649 | 0          | 0          |
| <i>Gracilaria</i>             | 0 | 0.00345395 | 0          | 0          | 0          |
| <i>Harpacticoida</i>          | 0 | 0          | 0          | 0.01605557 | 0          |
| <i>Heterobranchia</i>         | 0 | 0          | 0.10521577 | 0          | 0          |
| <i>Heteromita</i>             | 0 | 0          | 0          | 0.00063586 | 0          |
| <i>Hyalodiscus</i>            | 0 | 0.00076755 | 0          | 0          | 0          |
| <i>Islandinium</i>            | 0 | 0          | 0          | 0          | 0.01576872 |
| <i>Leptothecata</i>           | 0 | 0          | 0.42810108 | 0.10014863 | 0.14409923 |
| <i>Mammalia</i>               | 0 | 0          | 0.0019419  | 0          | 0.00067101 |
| Marine_Group                  | 0 | 0          | 0          | 0          | 0.00134202 |
| <i>Microglena</i>             | 0 | 0.00019189 | 0          | 0          | 0          |
| <i>Monhysterida</i>           | 0 | 0.01055375 | 0          | 0          | 0          |
| <i>Monoraphidium</i>          | 0 | 0.00172698 | 0          | 0          | 0          |
| <i>Myoida</i>                 | 0 | 0          | 0.02701009 | 0          | 0          |
| <i>Nannochloropsis</i>        | 0 | 0.00076755 | 0          | 0          | 0          |
| <i>Palpata_Incertae_Sedis</i> | 0 | 0.00479716 | 0          | 0          | 0          |
| <i>Parvilucifera</i>          | 0 | 0.00153509 | 0          | 0          | 0          |
| <i>Pelagodinium</i>           | 0 | 0          | 0.00547263 | 0.00238449 | 0.04227358 |
| <i>Peridiniales</i>           | 0 | 0          | 0          | 0          | 0.02902115 |
| <i>Phycodryes</i>             | 0 | 0          | 0.00176537 | 0          | 0          |
| <i>Pinophyta</i>              | 0 | 0.00172698 | 0          | 0          | 0          |
| <i>Protaspis</i>              | 0 | 0          | 0.00141229 | 0          | 0.02482734 |
| <i>Protoperidinium</i>        | 0 | 0          | 0          | 0          | 0.04780941 |
| <i>Sessilia</i>               | 0 | 0          | 0.07290959 | 0          | 0          |

---

|                          |   |            |            |            |            |
|--------------------------|---|------------|------------|------------|------------|
| <i>Skeletonema</i>       | 0 | 0          | 0.02171399 | 0.00143069 | 0.00570358 |
| <i>Spionida</i>          | 0 | 0.00307018 | 0.05949281 | 0          | 0          |
| <i>Stephanopyxis</i>     | 0 | 0.01170506 | 0          | 0          | 0          |
| <i>Stolidobranchia</i>   | 0 | 0.01228072 | 0          | 0          | 0          |
| <i>Tetraselmis</i>       | 0 | 0          | 0          | 0          | 0.03103418 |
| <i>Triceratium</i>       | 0 | 0          | 0          | 0          | 0.0070456  |
| <i>Tylenchida</i>        | 0 | 0.00498904 | 0          | 0          | 0          |
| Uncultured_Cercozoa      | 0 | 0.00249452 | 0          | 0          | 0          |
| Uncultured_Chlorella     | 0 | 0.00230264 | 0          | 0          | 0          |
| Uncultured_Eimeriidae    | 0 | 0.00057566 | 0          | 0          | 0          |
| Uncultured_labyrinthulid | 0 | 0.00095943 | 0          | 0          | 0          |
| <i>Veneroida</i>         | 0 | 0          | 0.01518214 | 0          | 0.02734363 |
| <i>Westella</i>          | 0 | 0.00287829 | 0          | 0          | 0          |
